# Supplementary material for: Evaluating the impact on physical inactivity of Together an Active Future, a partnership approach to physical activity promotion. A difference-in-differences study
Source: HighWire-hosted journal article supplement (doi:10.1136/jech-2023-220891), 2023-11-06
Supplement: jech-2023-220891supp001_data_supplement.pdf [file jech-2023-220891supp001_data_supplement.pdf]

**Appendix 1. Local Authorities included in the control group.**

|                           |
|---------------------------|
| Halton                    |
| Warrington                |
| Blackpool                 |
| Cheshire East             |
| Cheshire West and Chester |
| Barrow-in-Furness         |
| Carlisle                  |
| Copeland                  |
| South Lakeland            |
| Chorley                   |
| Fylde                     |
| Lancaster                 |
| Preston                   |
| South Ribble              |
| West Lancashire           |
| Wyre                      |
| Knowsley                  |
| Liverpool                 |
| St. Helens                |
| Sefton                    |
| Wirral                    |

**Appendix 2. Description of the sample**

| Year                               | 2016             | 2017             | 2018             | 2019             | 2020             | 2021             |
|------------------------------------|------------------|------------------|------------------|------------------|------------------|------------------|
| <b>n</b>                           | 15637            | 15140            | 14534            | 14416            | 14410            | 14476            |
| <b>IMD (%)</b>                     |                  |                  |                  |                  |                  |                  |
| <b>Least deprived quartile</b>     | 3355<br>(21.5)   | 3259<br>(21.5)   | 2818<br>(19.4)   | 2863<br>(19.9)   | 2533<br>(17.6)   | 4377<br>(30.2)   |
| <b>2nd least deprived quartile</b> | 3595<br>(23.0)   | 3623<br>(23.9)   | 3363<br>(23.1)   | 3215<br>(22.3)   | 3415<br>(23.7)   | 3056<br>(21.1)   |
| <b>2nd most deprived quartile</b>  | 3351<br>(21.4)   | 3166<br>(20.9)   | 3229<br>(22.2)   | 3165<br>(22.0)   | 3160<br>(21.9)   | 3697<br>(25.5)   |
| <b>Most deprived quartile</b>      | 5336<br>(34.1)   | 5092<br>(33.6)   | 5124<br>(35.3)   | 5173<br>(35.9)   | 5302<br>(36.8)   | 3346<br>(23.1)   |
| <b>Male (%)</b>                    | 6896<br>(44.1)   | 6744<br>(44.5)   | 6473<br>(44.5)   | 6444<br>(44.7)   | 6397<br>(44.4)   | 6583<br>(45.5)   |
| <b>Urban (%)</b>                   | 12608<br>(80.6)  | 12161<br>(80.3)  | 11747<br>(80.8)  | 11642<br>(80.8)  | 11679<br>(81.0)  | 11706<br>(80.9)  |
| <b>AGE (mean (SD))</b>             | 53.23<br>(17.28) | 53.55<br>(17.32) | 53.32<br>(17.44) | 53.00<br>(17.32) | 53.28<br>(17.38) | 53.89<br>(17.38) |
| <b>Ethnicity (%)</b>               |                  |                  |                  |                  |                  |                  |
| <b>Asian</b>                       | 440 ( 2.9)       | 464 ( 3.2)       | 453 ( 3.2)       | 502 ( 3.6)       | 506 ( 3.6)       | 476 ( 3.4)       |
| <b>Black</b>                       | 52 ( 0.3)        | 64 ( 0.4)        | 63 ( 0.4)        | 67 ( 0.5)        | 61 ( 0.4)        | 72 ( 0.5)        |
| <b>Other/Mixed</b>                 | 156 ( 1.0)       | 171 ( 1.2)       | 183 ( 1.3)       | 167 ( 1.2)       | 181 ( 1.3)       | 203 ( 1.4)       |
| <b>White</b>                       | 14578<br>(95.7)  | 14011<br>(95.2)  | 13397<br>(95.0)  | 13238<br>(94.7)  | 13244<br>(94.7)  | 13275<br>(94.6)  |
| <b>Disability (%)</b>              | 2987<br>(20.1)   | 3026<br>(21.0)   | 2812<br>(20.2)   | 2885<br>(21.0)   | 2918<br>(21.4)   | 3064<br>(22.3)   |

**Appendix 3. Sensitivity analysis.**

Table A3. Percentage point reduction in inactivity associated with TAAF for 5 models with alternative combinations of (1) inverse probability of treatment weights (IPTW) and (2) survey weights. Model 5 uses IPTW that are stratified by survey year.

|   | Model                       | Estimate | 95% CI |       |
|---|-----------------------------|----------|--------|-------|
|   |                             |          | Lower  | Upper |
| 1 | IPTW+Survey weights         | -2.63    | -4.45  | -0.80 |
| 2 | NO IPTW + NO Survey weights | -1.95    | -3.42  | -0.47 |
| 3 | IPTW + NO Survey weights    | -2.14    | -3.77  | -0.51 |
| 4 | NO IPTW + Survey weights    | -2.11    | -3.72  | -0.49 |
| 5 | Annual IPTW                 | -2.28    | -3.99  | -0.57 |
